# Supplementary material
Source: PubMed Central journal article supplement (PMC526331)
Supplement: cmaj_171_9_1057__1.pdf [file cmaj_171_9_1057__1.pdf]

**e-Appendix 1: Number of patients treated by physicians before and after receipt of issues of Therapeutics Letter\***

| Letter   | Control group<br>n = 241 |           | Intervention group<br>n = 258 |           | Control group weighted<br>to intervention size |           | Ratio (intervention/control) |       |         |
|----------|--------------------------|-----------|-------------------------------|-----------|------------------------------------------------|-----------|------------------------------|-------|---------|
|          | Before                   | After     | Before                        | After     | Before                                         | After     | Before                       | After | Overall |
| 1        | 131 529                  | 132 735   | 149 735                       | 152 201   | 140 807                                        | 142 098   | 1.06                         | 1.07  | 1.07    |
| 2        | 134 245                  | 137 742   | 153 561                       | 157 743   | 143 714.6                                      | 147 458.2 | 1.07                         | 1.07  | 1.07    |
| 4        | 136 589                  | 142 610   | 156 390                       | 161 168   | 146 223.9                                      | 152 669.6 | 1.07                         | 1.05  | 1.06    |
| 6        | 142 091                  | 131 571   | 160 368                       | 144 926   | 152 114                                        | 140 851.9 | 1.05                         | 1.03  | 1.04    |
| 7 and 8† | 141 176                  | 131 588   | 156 544                       | 148 488   | 151 134.5                                      | 140 870.1 | 1.04                         | 1.05  | 1.04    |
| 11       | 129 951                  | 139 836   | 148 381                       | 152 891   | 139 117.7                                      | 149 700   | 1.07                         | 1.02  | 1.04    |
| 12       | 138 165                  | 140 163   | 150 533                       | 154 274   | 147 911.1                                      | 150 050   | 1.02                         | 1.03  | 1.02    |
| 14       | 133 403                  | 134 991   | 147 745                       | 147 487   | 142 813.2                                      | 144 513.2 | 1.03                         | 1.02  | 1.03    |
| 16       | 132 512                  | 139 935   | 150 358                       | 152 082   | 141 859.3                                      | 149 805.9 | 1.06                         | 1.02  | 1.04    |
| 18       | 141 967                  | 133 995   | 154 719                       | 148 121   | 151 981.3                                      | 143 446.9 | 1.02                         | 1.03  | 1.03    |
| 19       | 136 691                  | 129 775   | 152 195                       | 142 392   | 146 333.1                                      | 138 929.3 | 1.04                         | 1.02  | 1.03    |
| Total    | 1 498 319                | 1 494 941 | 1 680 529                     | 1 661 773 | 1 604 010                                      | 1 600 393 | 1.05                         | 1.04  | 1.04    |

\*Pre- and post-intervention observation periods were 3 months for all letters except Letters #7 and #8, which formed a 2-part series and were mailed 10 weeks apart; since the control group received Letter #7 8 weeks after the intervention group received Letter #8, the post-intervention follow-up for these letters was 8 weeks.

†Letter #8 was treated as a single intervention with Letter #7.
