# Supplementary material
Source: PubMed Central journal article supplement (PMC526331)
Supplement: cmaj_171_9_1057__2.pdf [file cmaj_171_9_1057__2.pdf]

---

**e-Appendix 2: Sensitivity analyses of combined result  
(in descending order of magnitude)**

---

| Excluded letters      | Overall preferred ratio<br>(95% CI) | Change<br>from 1.30 | Absolute<br>change |
|-----------------------|-------------------------------------|---------------------|--------------------|
| Letter 14             | 1.35 (1.20–1.51)                    | 0.046               | 0.046              |
| Letters 7 and 8       | 1.26 (1.12–1.42)                    | –0.044              | 0.044              |
| Letters 4, 7 and<br>8 | 1.26 (1.10–1.44)                    | –0.040              | 0.040              |
| Letter 8              | 1.28 (1.15–1.43)                    | –0.019              | 0.019              |
| Letter 7              | 1.28 (1.14–1.44)                    | –0.019              | 0.019              |
| Letter 11             | 1.32 (1.16–1.49)                    | 0.018               | 0.018              |
| Letter 2              | 1.28 (1.15–1.43)                    | –0.016              | 0.016              |
| Letter 19             | 1.32 (1.18–1.46)                    | 0.014               | 0.014              |
| Letter 1              | 1.29 (1.15–1.44)                    | –0.014              | 0.014              |
| Letter 4              | 1.31 (1.17–1.48)                    | 0.012               | 0.012              |
| Letter 16             | 1.29 (1.15–1.44)                    | –0.009              | 0.009              |
| Letter 18             | 1.31 (1.17–1.46)                    | 0.006               | 0.006              |
| Letter 6              | 1.30 (1.16–1.44)                    | –0.005              | 0.005              |
| Letter 12             | 1.30 (1.17–1.45)                    | –0.003              | 0.003              |

---

Note: CI = confidence intervals.
